# Supplementary material for: Mg-rich disordered rocksalt oxide cathodes for Mg-ion batteries
Source: Royal Society of Chemistry journal article supplement (doi:10.1039/d4ta02348j), 2024-01-01
Supplement: d4ta02348j1.pdf [file d4ta02348j1.pdf]

## Supporting Information

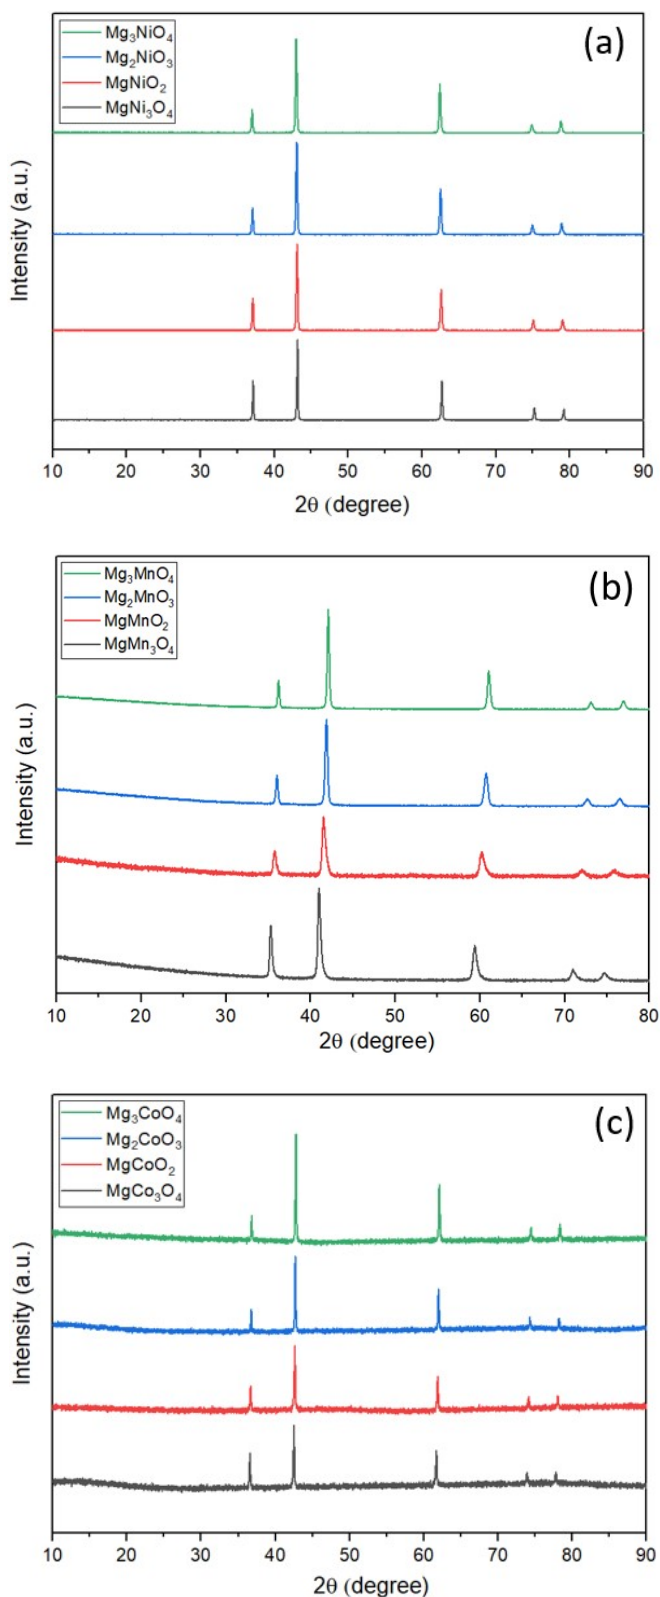

**Fig. S1. Monochromatic PXRD data** for as-synthesised (a)  $\text{Mg}_x\text{Ni}_{1-x}\text{O}$ , (b)  $\text{Mg}_x\text{Mn}_{1-x}\text{O}$ , and (c)  $\text{Mg}_x\text{Co}_{1-x}\text{O}$  samples via solid-state method.

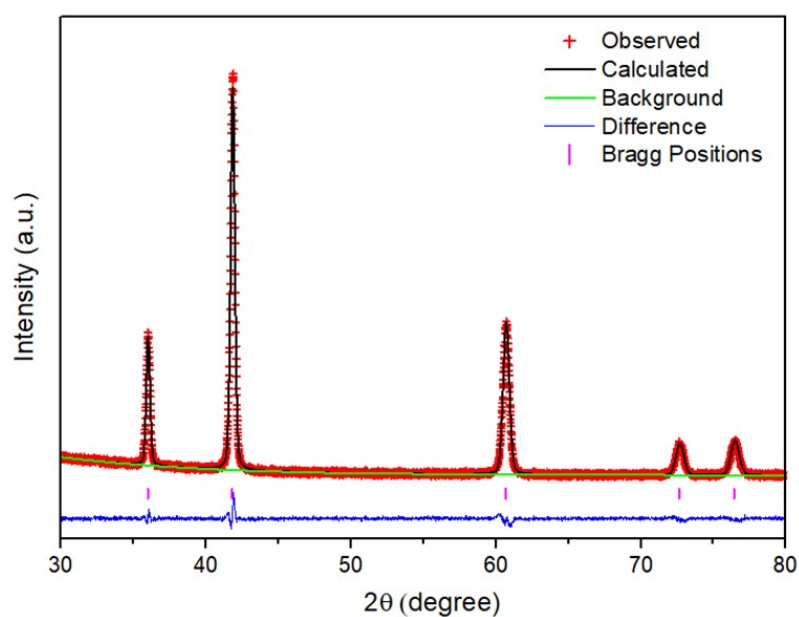

**Fig. S2. Fitted XRD data** for DRS Mg<sub>2</sub>MnO<sub>3</sub> (before ball-milling) refined with Fm-3m space group.

| Atom                                                                           | Wyckoff Positions | x   | y   | z   | Occupancy | U <sub>iso</sub> |
|--------------------------------------------------------------------------------|-------------------|-----|-----|-----|-----------|------------------|
| Mg                                                                             | a                 | 0   | 0   | 0   | 0.66      | 0.00977(4)       |
| Mn                                                                             | a                 | 0   | 0   | 0   | 0.34      | 0.01267(4)       |
| O                                                                              | b                 | 0.5 | 0.5 | 0.5 | 1         | 0.01479(3)       |
| a=4.3054(3) Å, Space Group: Fm-3m, Domain size (μm)=1.0001, Microstrain=1081.2 |                   |     |     |     |           |                  |
| RF=1.057%, reduced $\chi^2=1.24$                                               |                   |     |     |     |           |                  |

**Table S1. Table of XRD Rietveld refinement parameters** for Mg<sub>2</sub>MnO<sub>3</sub> (before ball-milling).

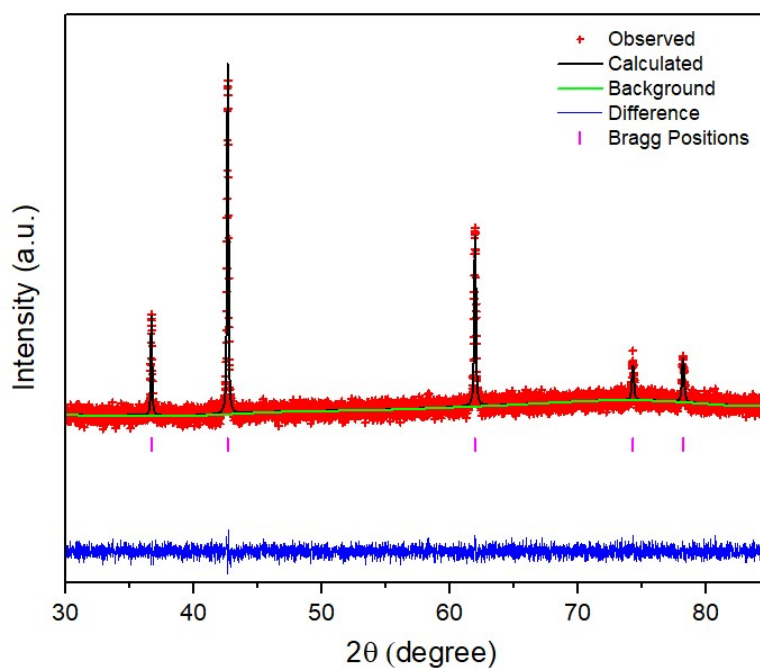

**Fig. S3. Fitted XRD data** for DRS  $\text{Mg}_2\text{CoO}_3$  refined with Fm-3m space group.

| Atom                              | Wyckoff Positions | x   | y   | z   | Occupancy | $U_{\text{iso}}$ |
|-----------------------------------|-------------------|-----|-----|-----|-----------|------------------|
| Mg                                | a                 | 0   | 0   | 0   | 0.66      | 0.00122(1)       |
| Co                                | a                 | 0   | 0   | 0   | 0.34      | 0.00478(4)       |
| O                                 | b                 | 0.5 | 0.5 | 0.5 | 1         | 0.00229(1)       |
| a=4.2273(4) Å, Space Group: Fm-3m |                   |     |     |     |           |                  |
| RF=24.231%, reduced $\chi^2=0.86$ |                   |     |     |     |           |                  |

**Table S2. Table of XRD Rietveld refinement parameters** for  $\text{Mg}_2\text{CoO}_3$ . It should be noted that the PXRD data for Co-containing compounds is noisy due to the high background fluorescence from Co.

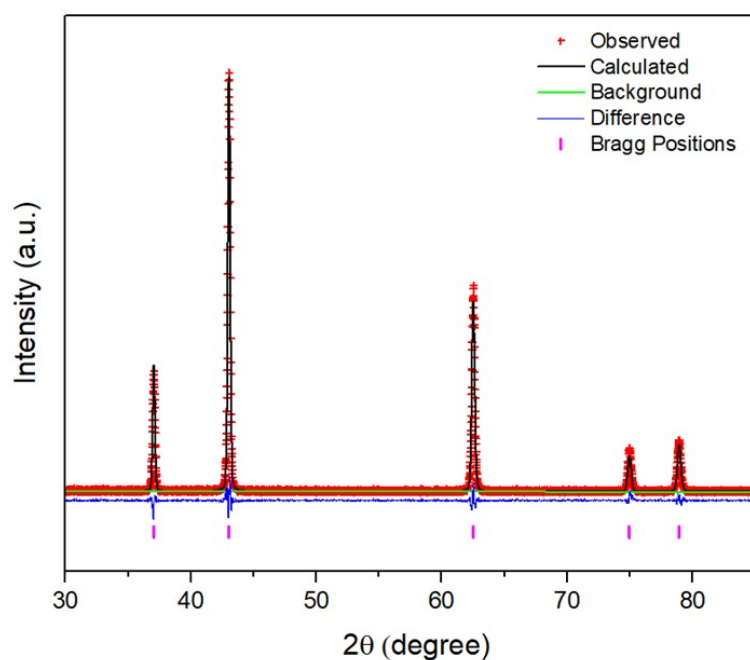

**Fig. S4. Fitted XRD data** for DRS Mg<sub>2</sub>NiO<sub>3</sub> refined with Fm-3m space group.

| Atom | Wyckoff Positions | x   | y   | z   | Occupancy | U <sub>iso</sub> |
|------|-------------------|-----|-----|-----|-----------|------------------|
| Mg   | a                 | 0   | 0   | 0   | 0.66      | 0.02085(6)       |
| Ni   | a                 | 0   | 0   | 0   | 0.34      | 0.00070(6)       |
| O    | b                 | 0.5 | 0.5 | 0.5 | 1         | 0.00551(1)       |

a=4.2041(7) Å, Space Group: Fm-3m  
 RF=4.310%, reduced  $\chi^2=1.00$

**Table S3. Table of XRD Rietveld refinement parameters** for Mg<sub>2</sub>NiO<sub>3</sub>.

| Atom                    | Wyckoff | x         | y   | z           | Occupancy |
|-------------------------|---------|-----------|-----|-------------|-----------|
| Mg                      | a       | 0         | 0   | 0           | 0.66      |
| Mn                      | a       | 0         | 0   | 0           | 0.34      |
| O                       | b       | 0.5       | 0.5 | 0.5         | 1         |
| S.G.=Fm $\bar{3}$ m,    |         | a=4.313 Å |     | $\alpha=90$ |           |
| R <sub>w</sub> =0.207,  |         |           |     |             |           |
| Q <sub>max</sub> =24 Å, |         |           |     |             |           |
| r=1-40 Å,               |         |           |     |             |           |

**Table S4. X-ray PDF refinement parameters for Mg<sub>2</sub>MnO<sub>3</sub> (without ball-milling).**

| Atom                    | Wyckoff | x         | y   | z           | Occupancy |
|-------------------------|---------|-----------|-----|-------------|-----------|
| Mg                      | a       | 0         | 0   | 0           | 0.66      |
| Co                      | a       | 0         | 0   | 0           | 0.34      |
| O                       | b       | 0.5       | 0.5 | 0.5         | 1         |
| S.G.=Fm $\bar{3}$ m,    |         | a=4.230 Å |     | $\alpha=90$ |           |
| R <sub>w</sub> =0.180,  |         |           |     |             |           |
| Q <sub>max</sub> =24 Å, |         |           |     |             |           |
| r=1-40 Å,               |         |           |     |             |           |

**Table S5. X-ray PDF refinement parameters for Mg<sub>2</sub>CoO<sub>3</sub>.**

| Atom                    | Wyckoff | x         | y   | z           | Occupancy |
|-------------------------|---------|-----------|-----|-------------|-----------|
| Mg                      | a       | 0         | 0   | 0           | 0.66      |
| Ni                      | a       | 0         | 0   | 0           | 0.34      |
| O                       | b       | 0.5       | 0.5 | 0.5         | 1         |
| S.G.=Fm $\bar{3}$ m,    |         | a=4.196 Å |     | $\alpha=90$ |           |
| R <sub>w</sub> =0.191,  |         |           |     |             |           |
| Q <sub>max</sub> =24 Å, |         |           |     |             |           |
| r=1-40 Å,               |         |           |     |             |           |

**Table S6. X-ray PDF refinement parameters for Mg<sub>2</sub>NiO<sub>3</sub>.**

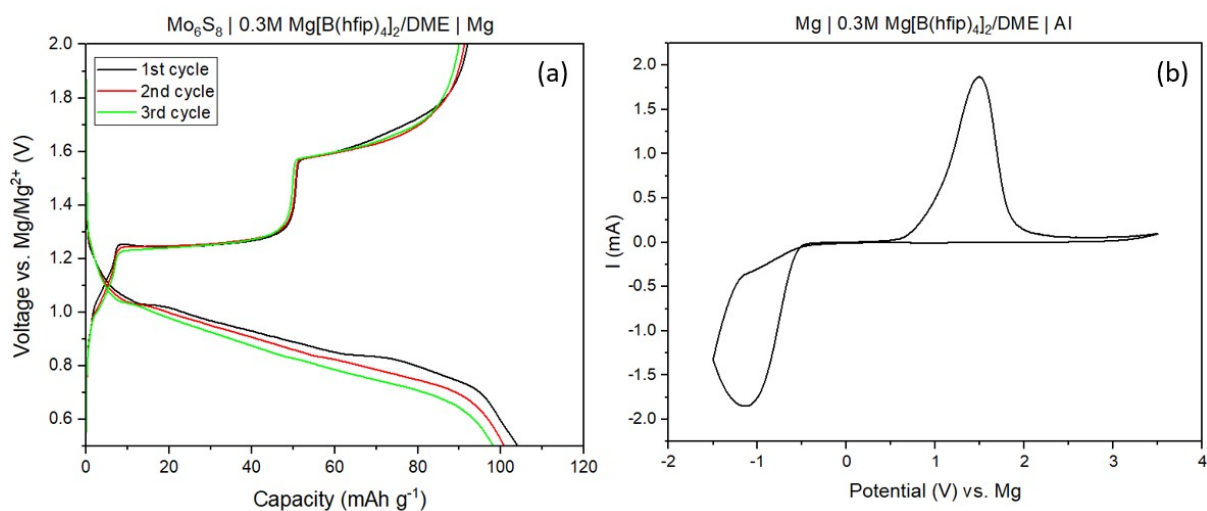

**Fig. S5. (a). Galvanostatic discharge/charge profile** of a  $\text{Mo}_6\text{S}_8||\text{Mg}$  cell at  $60^\circ\text{C}$  using the  $0.3\text{ M Mg}[\text{B}(\text{hfip})_4]_2$  in DME electrolyte, which shows comparable capacity to reported results.<sup>26,32</sup> **(b) Cyclic voltammograms** using Al as the working electrode and Mg as the reference at a scan rate of  $25\text{ mV s}^{-1}$ , and the profile reveals the  $0.3\text{ M Mg}[\text{B}(\text{hfip})_4]_2/\text{DME}$  electrolyte is stable to at least  $3.5\text{ V vs. Mg}$  in standard coin cells.

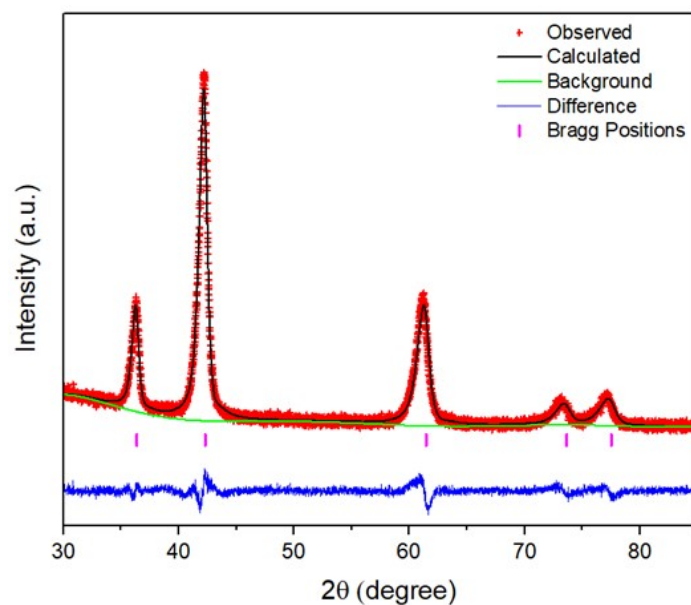

**Fig. S6. Fitted XRD data** for  $\text{Mg}_2\text{MnO}_3$  after ball-milling at 200 rpm refined with Fm-3m space group.

| Atom                                                                                      | Wyckoff Positions | x   | y   | z   | Occupancy | $U_{\text{iso}}$ |
|-------------------------------------------------------------------------------------------|-------------------|-----|-----|-----|-----------|------------------|
| Mg                                                                                        | a                 | 0   | 0   | 0   | 0.66      | 0.04190(2)       |
| Mn                                                                                        | a                 | 0   | 0   | 0   | 0.34      | 0.01434(3)       |
| O                                                                                         | b                 | 0.5 | 0.5 | 0.5 | 1         | 0.0002(0)        |
| a=4.1970(8), Space Group: Fm-3m, Domain size ( $\mu\text{m}$ )=0.0389, Microstrain=2110.3 |                   |     |     |     |           |                  |
| RF=1.628%, reduced $\chi^2=1.58$                                                          |                   |     |     |     |           |                  |

**Table S7. Table of XRD Rietveld refinement parameters** for  $\text{Mg}_2\text{MnO}_3$  after ball-milling at 200 rpm. The domain size is noted to be much reduced compared to the sample before ball-milling, accompanied by an increased degree of strain effects.

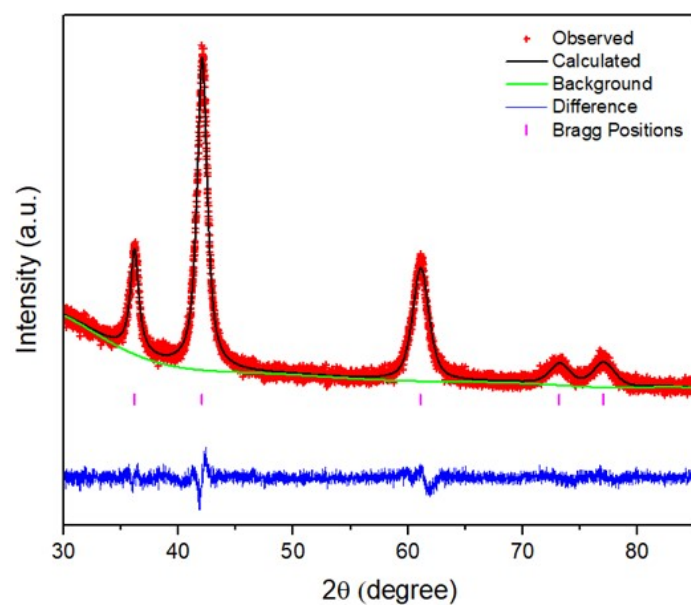

**Fig. S7. Fitted XRD data** for  $\text{Mg}_2\text{MnO}_3$  after ball-milling at 300 rpm refined with Fm-3m space group.

| Atom                                                                                      | Wyckoff Positions | x   | y   | z   | Occupancy | $U_{\text{iso}}$ |
|-------------------------------------------------------------------------------------------|-------------------|-----|-----|-----|-----------|------------------|
| Mg                                                                                        | a                 | 0   | 0   | 0   | 0.66      | 0.04397(2)       |
| Mn                                                                                        | a                 | 0   | 0   | 0   | 0.34      | 0.00007(9)       |
| O                                                                                         | b                 | 0.5 | 0.5 | 0.5 | 1         | 0.01789(4)       |
| a=4.2298(8), Space Group: Fm-3m, Domain size ( $\mu\text{m}$ )=0.0168, Microstrain=2531.6 |                   |     |     |     |           |                  |
| RF=1.582%, reduced $\chi^2=1.09$                                                          |                   |     |     |     |           |                  |

**Table S8. Table of XRD Rietveld refinement parameters** for  $\text{Mg}_2\text{MnO}_3$  after ball-milling at 300 rpm. The domain size is noted to be smaller compared to that of  $\text{Mg}_2\text{MnO}_3$  after ball-milling at 200 rpm and the sample before ball-milling, whereas the microstrain is the highest.



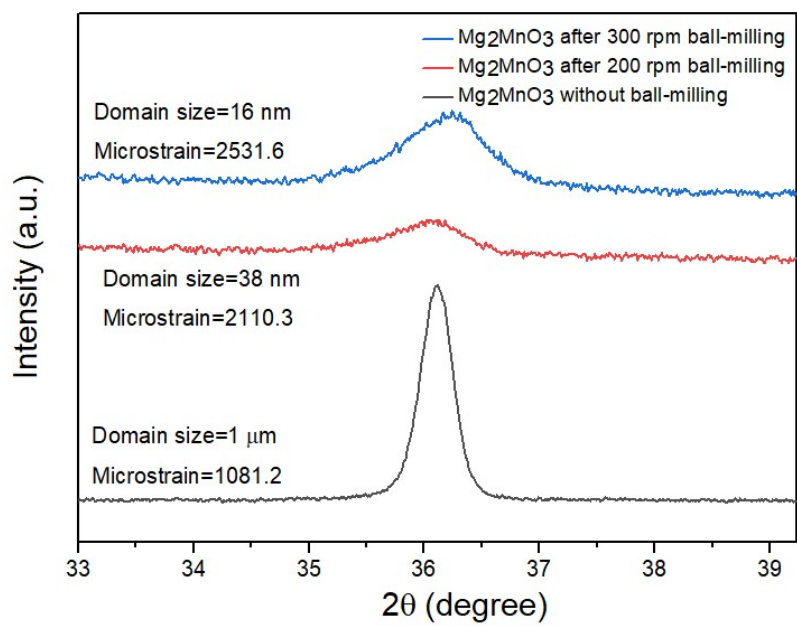

**Fig. S8. PXRD patterns** of Mg<sub>2</sub>MnO<sub>3</sub> showing the shift in (111) peak to higher scattering angle and peak broadening after ball-milling.

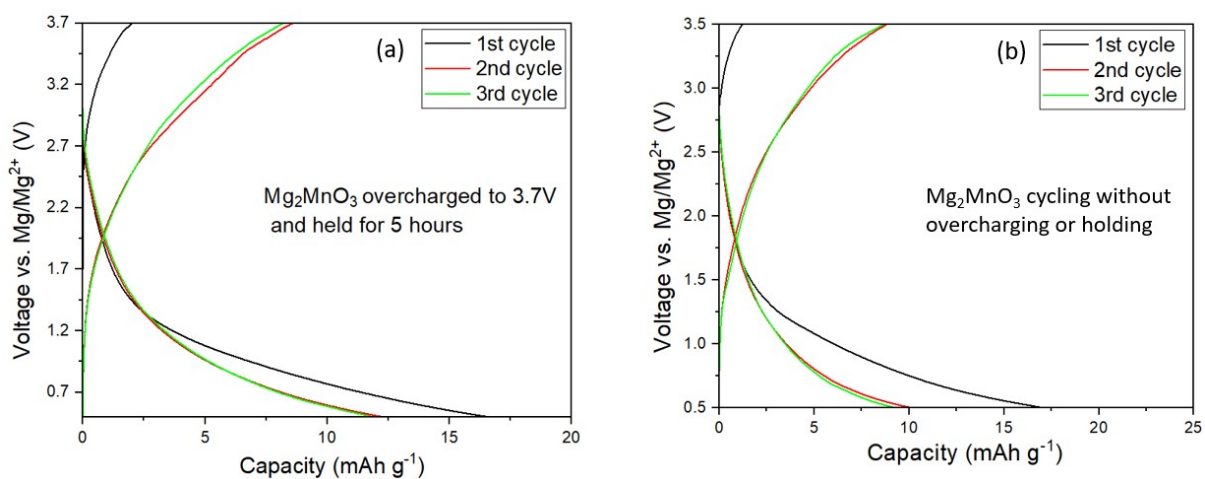

**Fig. S9. Charge/discharge profiles** of  $\text{Mg}_2\text{MnO}_3$  after ball-milling at 300 rpm at 60°C and at a current density of 10 mA g<sup>-1</sup>. The cathode was overcharged to 3.7V and held for 5 hours as an attempt to force it to de-magnesiate.
